# Supplementary material for: Exploring the mechanisms of Drynariae Rhizoma on treating memory impairment through network pharmacology
Source: Research Square preprint supplement (doi:10.21203/rs.3.rs-936609/v1), 2021-10-12
Supplement: Supplementary file 1 [file d4fdef666865c7f53cc5eb81.xlsx]

## Sheet: supply_table1
Table S1. 60 common target genes between DR and memory impairment.
Gene symbol	Gene ID	UniProt	Gene name
ADORA2A	135	P29274	adenosine A2a receptor
AKT1	207	P31749	AKT serine/threonine kinase 1
AKT2	208	P31751	AKT serine/threonine kinase 2
ARSA	410	P15289	arylsulfatase A
BACE1	23621	P56817	beta-secretase 1
BCHE	590	P06276	butyrylcholinesterase
BHMT	635	Q93088	betaine--homocysteine S-methyltransferase
CASP1	834	P29466	caspase 1
CASP3	836	P42574	caspase 3
CCNA2	890	P20248	cyclin A2
CDK5R1	8851	Q15078	cyclin dependent kinase 5 regulatory subunit 1
CFD	1675	P00746	complement factor D
CTSB	1508	P07858	cathepsin B
CTSK	1513	P43235	cathepsin K
DAPK1	1612	P53355	death associated protein kinase 1
DPP4	1803	P27487	dipeptidyl peptidase 4
EIF4E	1977	P06730	eukaryotic translation initiation factor 4E
ERBB4	2066	Q15303	erb-b2 receptor tyrosine kinase 4
ESR1	2099	P03372	estrogen receptor 1
ESR2	2100	Q92731	estrogen receptor 2
FOLH1	2346	Q04609	folate hydrolase 1
GSK3B	2932	P49841	glycogen synthase kinase 3 beta
GSTM1	2944	P09488	glutathione S-transferase mu 1
HDAC8	55869	Q9BY41	histone deacetylase 8
HSD11B1	3290	P28845	hydroxysteroid 11-beta dehydrogenase 1
IGF1	3479	P05019	insulin like growth factor 1
INSR	3643	P06213	insulin receptor
LCN2	3934	P80188	lipocalin 2
LGALS3	3958	P17931	galectin 3
MAOB	4129	P27338	monoamine oxidase B
MAPK1	5594	P28482	mitogen-activated protein kinase 1
MAPK14	1432	Q16539	mitogen-activated protein kinase 14
MAPK8	5599	P45983	mitogen-activated protein kinase 8
MIF	4282	P14174	macrophage migration inhibitory factor
MME	4311	P08473	membrane metalloendopeptidase
NOS2	4843	P35228	nitric oxide synthase 2
NOS3	4846	P29474	nitric oxide synthase 3
NQO2	4835	P16083	N-ribosyldihydronicotinamide:quinone reductase 2
NR3C1	2908	P04150	nuclear receptor subfamily 3 group C member 1
NR3C2	4306	P08235	nuclear receptor subfamily 3 group C member 2
OAT	4942	P04181	ornithine aminotransferase
PAH	5053	P00439	phenylalanine hydroxylase
PARP1	142	P09874	poly(ADP-ribose) polymerase 1
PDE4B	5142	Q07343	phosphodiesterase 4B
PDE4D	5144	Q08499	phosphodiesterase 4D
PDE5A	8654	O76074	phosphodiesterase 5A
PIK3CG	5294	P48736	phosphatidylinositol-4
PIK3R1	5295	P27986	phosphoinositide-3-kinase regulatory subunit 1
PPARA	5465	Q07869	peroxisome proliferator activated receptor alpha
PPARD	5467	Q03181	peroxisome proliferator activated receptor delta
PPARG	5468	P37231	peroxisome proliferator activated receptor gamma
PPP5C	5536	P53041	protein phosphatase 5 catalytic subunit
PSAP	5660	P07602	prosaposin
PTPN1	5770	P18031	protein tyrosine phosphatase non-receptor type 1
RARA	5914	P10276	retinoic acid receptor alpha
REN	5972	P00797	renin
S100A9	6280	P06702	S100 calcium binding protein A9
SHBG	6462	P04278	sex hormone binding globulin
STS	412	P08842	steroid sulfatase
THRA	7067	P10827	thyroid hormone receptor alpha
