# Supplementary material for: Exploring the mechanisms of Drynariae Rhizoma on treating memory impairment through network pharmacology
Source: Research Square preprint supplement (doi:10.21203/rs.3.rs-936609/v1), 2021-10-12
Supplement: Supplementary file 2 [file dee44018f6d91b72c0f30d2f.xlsx]

## Sheet: Sheet1
Table 3. Molecular docking information of Akt1 and compounds
Compound	Total score	C-score	Interacting amino acids
Xanthogalenol	4.45	5	Val4, Glu49
Capivasertib	5.21	4	Lys30, Thr34, Arg48, Glu49
Oxiracetam	4.87	4	Lys30, Thr34, Tyr38
